# Supplementary material
Source: PubMed Central journal article supplement (PMC3562779)
Supplement: 1214207110_pnas.201214207SI.pdf [file 1214207110_pnas.201214207SI.pdf]

# Supporting Information

Moulton et al. 10.1073/pnas.1214207110

**Table S1. Patient demographics, SLEDAI score, and treatment information**

| ID                          | SLEDAI | Prednisone, mg/d | HQ, mg/d | Azathioprine, mg/d | Methotrexate, mg/wk | Mycophenolate, mg/d | Race  | Sex | Age, y |
|-----------------------------|--------|------------------|----------|--------------------|---------------------|---------------------|-------|-----|--------|
| mRNA samples                |        |                  |          |                    |                     |                     |       |     |        |
| 1                           | 0      | —                | 400      | 100                | —                   | —                   | White | F   | 50     |
| 2                           | 6      | —                | 400      | 100                | —                   | —                   | Asian | F   | 25     |
| 3                           | 4      | 10               | 400      | —                  | —                   | 2,000               | Black | F   | 38     |
| 4                           | 0      | —                | 400      | 100                | —                   | —                   | White | F   | 38     |
| 5                           | 0      | —                | —        | —                  | 15                  | —                   | White | F   | 54     |
| 6                           | 8      | —                | —        | —                  | —                   | 1,000               | Other | F   | 35     |
| 7                           | 8      | 15               | 400      | 150                | —                   | —                   | Black | F   | 40     |
| 8                           | 0      | —                | 400      | —                  | —                   | 1,000               | Other | F   | 25     |
| 9                           | 2      | —                | 200      | —                  | —                   | —                   | Asian | F   | 24     |
| 10                          | 4      | 5                | 400      | —                  | —                   | 1,500               | Black | F   | 28     |
| 11                          | 1      | —                | 400      | —                  | —                   | —                   | Black | F   | 44     |
| 12                          | 2      | 6                | 400      | 100                | 20                  | —                   | White | F   | 36     |
| 13                          | 6      | 30               | —        | —                  | —                   | 3,000               | Black | F   | 33     |
| 14                          | 26     | 40               | —        | —                  | —                   | 3,000               | Black | F   | 27     |
| 15                          | 10     | 20               | 400      | —                  | —                   | 2,500               | Black | F   | 38     |
| 16                          | 2      | —                | 400      | —                  | —                   | —                   | White | F   | 40     |
| 17                          | 36     | 1,200            | —        | —                  | —                   | —                   | Asian | F   | 35     |
| 18                          | 4      | 5                | 400      | 150                | —                   | —                   | Black | M   | 25     |
| 19                          | 2      | —                | —        | —                  | —                   | —                   | White | F   | 29     |
| 20                          | 0      | —                | 400      | —                  | 15                  | —                   | White | F   | 25     |
| 21                          | 3      | —                | 400      | —                  | —                   | —                   | White | F   | 42     |
| 22                          | 12     | 40               | 400      | —                  | —                   | —                   | White | F   | 19     |
| 23                          | 0      | 10               | —        | —                  | —                   | —                   | Black | M   | 35     |
| 24                          | 2      | —                | 400      | —                  | —                   | 2,000               | White | F   | 49     |
| 25                          | 5      | 5                | —        | —                  | —                   | —                   | White | F   | 38     |
| 26                          | 4      | —                | 400      | —                  | —                   | —                   | Asian | F   | 31     |
| 27                          | 5      | 30               | 400      | —                  | —                   | —                   | White | F   | 25     |
| 28                          | 4      | 7.5              | 200      | —                  | —                   | 2,000               | Black | F   | 18     |
| 29                          | 4      | 3.33             | 400      | —                  | —                   | —                   | White | F   | 36     |
| 30                          | 0      | 20               | —        | —                  | —                   | —                   | White | F   | 50     |
| 31                          | 0      | 3.75             | —        | —                  | —                   | —                   | White | F   | 52     |
| 32                          | 0      | —                | —        | —                  | —                   | —                   | White | F   | 30     |
| Common mRNA/protein samples |        |                  |          |                    |                     |                     |       |     |        |
| 33                          | 4      | 15               | 400      | —                  | —                   | —                   | Black | F   | 22     |
| 34                          | 4      | 10               | 400      | —                  | —                   | 2,500               | Black | F   | 29     |
| 35                          | 2      | —                | 400      | 50                 | —                   | —                   | White | F   | 34     |
| 36                          | 8      | 17.5             | —        | —                  | —                   | 3,000               | Black | F   | 49     |
| 37                          | 3      | —                | —        | 100                | —                   | —                   | Black | F   | 32     |
| 38                          | 0      | —                | 400      | —                  | —                   | —                   | White | F   | 42     |
| 39                          | 0      | —                | 400      | —                  | —                   | —                   | White | F   | 37     |
| 40                          | 0      | 3                | 400      | —                  | —                   | —                   | Asian | F   | 23     |
| 41                          | 0      | —                | 400      | —                  | 25                  | —                   | Black | F   | 51     |
| 42                          | 0      | 5                | —        | 150                | —                   | —                   | Black | F   | 32     |
| 43                          | 0      | —                | 400      | —                  | —                   | —                   | Black | F   | 42     |
| 44                          | 4      | —                | 400      | —                  | —                   | —                   | White | F   | 46     |
| 45                          | 4      | —                | —        | —                  | —                   | 2,500               | White | F   | 48     |
| 46                          | 2      | 3.75             | 400      | —                  | —                   | 2,000               | Black | F   | 60     |
| 47                          | 1      | —                | —        | —                  | —                   | —                   | Black | F   | 21     |
| Protein samples             |        |                  |          |                    |                     |                     |       |     |        |
| 48                          | 2      | 10               | 400      | —                  | —                   | 3,000               | Black | F   | 37     |
| 49                          | 4      | 10               | 600      | —                  | —                   | —                   | White | F   | 50     |
| 50                          | 6      | —                | 400      | 100                | —                   | —                   | White | F   | 38     |
| 51                          | 2      | 15               | —        | 150                | —                   | —                   | White | F   | 49     |
| 52                          | 2      | 5                | —        | —                  | —                   | —                   | White | F   | 55     |
| 53                          | 2      | —                | —        | —                  | —                   | 1,000               | Other | F   | 35     |

**Table S1. Cont.**

| ID | SLEDAI | Prednisone, mg/d | HQ, mg/d | Azathioprine, mg/d | Methotrexate, mg/wk | Mycophenolate, mg/d | Race  | Sex | Age, y |
|----|--------|------------------|----------|--------------------|---------------------|---------------------|-------|-----|--------|
| 54 | 2      | 5                | 400      | —                  | —                   | —                   | White | F   | 35     |
| 55 | 14     | 40               | —        | —                  | —                   | 1,000               | Mixed | F   | 34     |
| 56 | 0      | 10               | 400      | —                  | —                   | —                   | White | F   | 28     |
| 57 | 8      | 10               | 400      | 100                | —                   | —                   | White | F   | 39     |
| 58 | 6      | 0                | —        | —                  | —                   | —                   | White | F   | 36     |
| 59 | 0      | 0                | 400      | —                  | —                   | —                   | White | F   | 40     |
| 60 | 0      | —                | —        | —                  | —                   | —                   | Black | F   | 24     |
| 61 | 16     | 50               | 400      | —                  | —                   | —                   | White | F   | 19     |
| 62 | 0      | 10               | 400      | —                  | —                   | —                   | White | F   | 19     |
| 63 | 2      | —                | —        | —                  | —                   | 1,000               | White | F   | 49     |
| 64 | 7      | 4                | —        | —                  | —                   | —                   | White | F   | 38     |
| 65 | 4      | —                | 400      | —                  | —                   | —                   | Asian | F   | 33     |
| 66 | 4      | 13               | 400      | —                  | 12.5                | —                   | White | F   | 48     |
| 67 | 4      | —                | —        | —                  | —                   | —                   | White | F   | 31     |
| 68 | 0      | 10               | 400      | —                  | —                   | —                   | Black | F   | 25     |
| 69 | 2      | 10               | 400      | —                  | —                   | —                   | White | F   | 34     |
| 70 | 4      | —                | 300      | —                  | —                   | 1,000               | White | F   | 44     |

HQ, hydroxychloroquine; SLEDAI, systemic lupus erythematosus disease activity index.
